# Supplementary material
Source: publisher figshare collection journal article supplement (https://springernature.figshare.com/articles/dataset/_/7598393)
Supplement: Supplementary file [file 14106674]

## Additional file 1

**Table S1** Clinical characteristics of the breast cancer patients in this study.

| Patient number (IRB number) | Age | Histology Grade | Diagnosis        | Tumor size | Chemo-therapy | HER2 | KI-67 (%) | p53 (%) | ER (%) | PR (%) |
|-----------------------------|-----|-----------------|------------------|------------|---------------|------|-----------|---------|--------|--------|
| 1 (1)                       | 45  | 3               | IDC              | 3.5        | X             | NA   | 0         | 0       | 80     | 82     |
| 2 (2)                       | 49  | 4               | IDC              | 4.5        | X             | NA   | 1         | 0       | 95     | 80     |
| 3 (3)                       | 54  | 1               | IDC              | 1.3        | X             | NA   | 20        | 95      | 0      | 0      |
| 4 (4)                       | 68  | 1               | IDC              | 1.1        | X             | NA   | 10        | 80      | 95     | 5      |
| 5 (5)                       | 41  | 2               | IDC              | 2          | X             | NA   | 15        | 1       | 80     | 84     |
| 9 (6)                       | 42  | 1               | Fibroadenoma     | 0.7        | X             | NA   | 0         | 0       | 0      | 0      |
| 11 (7)                      | 65  | 3               | IDC              | 3.1        | X             | NA   | 5         | 10      | 10     | 10     |
| 12 (8)                      | 74  | 1               | IDC              | 1.5        | X             | NA   | 5         | 10      | 80     | 50     |
| 16 (9)                      | 46  | 1               | IDC              | 1.1        | X             | NA   | 20        | 50      | 50     | 0      |
| 18 (10)                     | 70  | 3               | IDC              | 3.3        | O             | NA   | 40        | 1       | 0      | 10     |
| 19 (11)                     | 39  | 1               | IDC              | 1.2        | X             | NA   | 10        | 0       | 90     | 90     |
| 21 (12)                     | 43  | 2               | IDC              | 2.6        | X             | NA   | 50        | 95      | 10     | 0      |
| 24 (13)                     | 71  | 4               | IDC              | 5.5        | X             | NA   | 10        | 1       | 90     | 10     |
| 25 (14)                     | 64  | 1               | IDC              | 0.8        | X             | NA   | 5         | 0       | 95     | 10     |
| 27 (15)                     | 38  | 4               | Ductal carcinoma | 4.9        | X             | NA   | 100       | 0       | 0      | 90     |
| 28 (16)                     | 53  | 3               | IDC              | 4          | O             | NA   | 0         | 0       | 75     | 75     |
| 31 (17)                     | 36  | 2               | IDC              | 2          | X             | O    | 50        | 1       | 60     | 0      |
| 32 (18)                     | 46  | 2               | IDC              | 2.3        | X             | O    | 80        | 100     | 0      | 0      |
| 33 (19)                     | 49  | 3               | IDC              | 3.3        | O             | NA   | 30        | 10      | 90     | 1      |
| 34 (20)                     | 47  | 4               | Phyllodes        | 7          | X             | NA   | 0         | 0       | 0      | 0      |
| 35 (21)                     | 31  | 4               | Ductal carcinoma | 5.5        | X             | O    | 80        | 100     | 0      | 0      |
| 44 (22)                     | 40  | 1               | Fibroadenoma     | 0.8        | X             | O    | 0         | 0       | 0      | 0      |
| 45 (23)                     | 49  | 2               | IDC              | 2.2        | X             | O    | 0         | 0       | 70     | 95     |
